# Supplementary material for: Amazonian Aerosol Size Distributions in a Lognormal Phase Space: Characteristics and Trajectories
Source: Copernicus journal article supplement (doi:10.5194/egusphere-2023-1361), 2023-06-26
Supplement: Supplementary file 1 [file egusphere-2023-1361-supplement.pdf]

Supplement

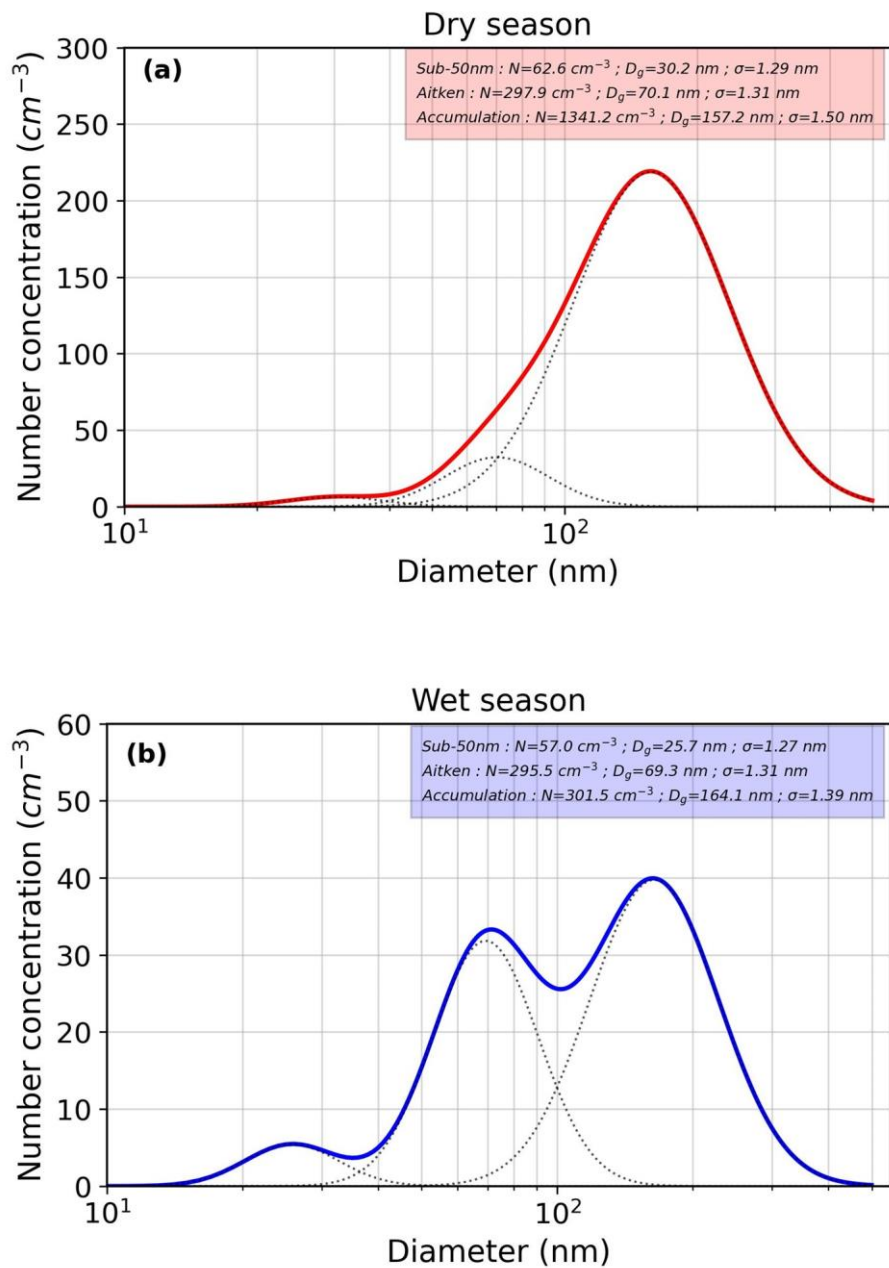

Figure S1. A glimpse of the Amazonian PNSD curve for (a) dry and (b) wet seasons. The colored curves represent the mean curve, and the dotted ones represent the modes. In the box, there are the mean values used to plot the curves.

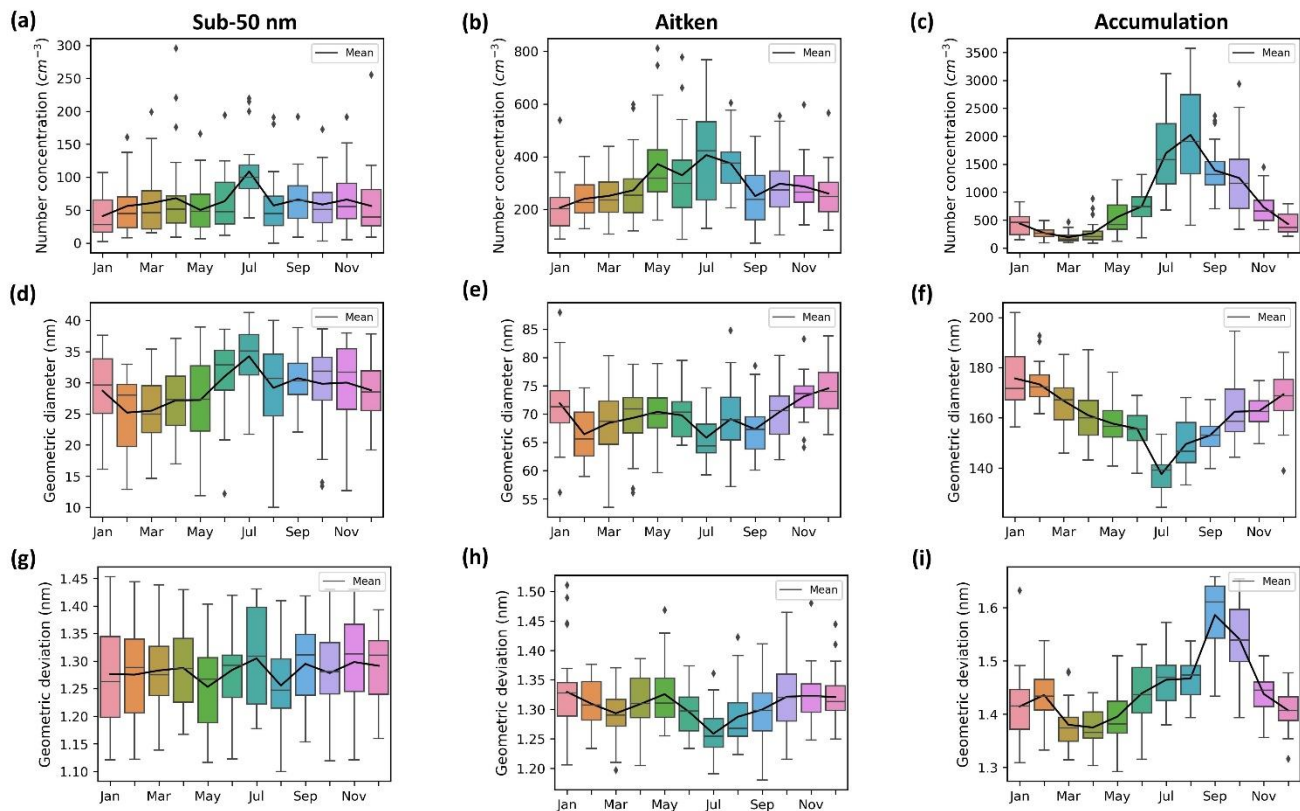

**Figure S2.** Monthly boxplot of each parameter of the multi-modal lognormal fit. The modes are shown in each column and the parameters number concentration ( $N$ ), geometric diameter ( $D_g$ ), and standard geometric deviation ( $\sigma$ ) are in each row, respectively. The solid line represents the mean.

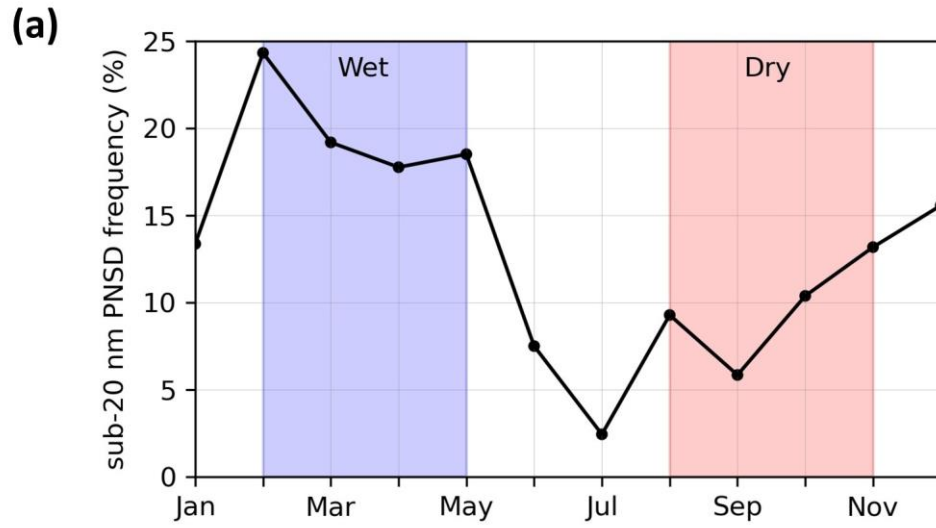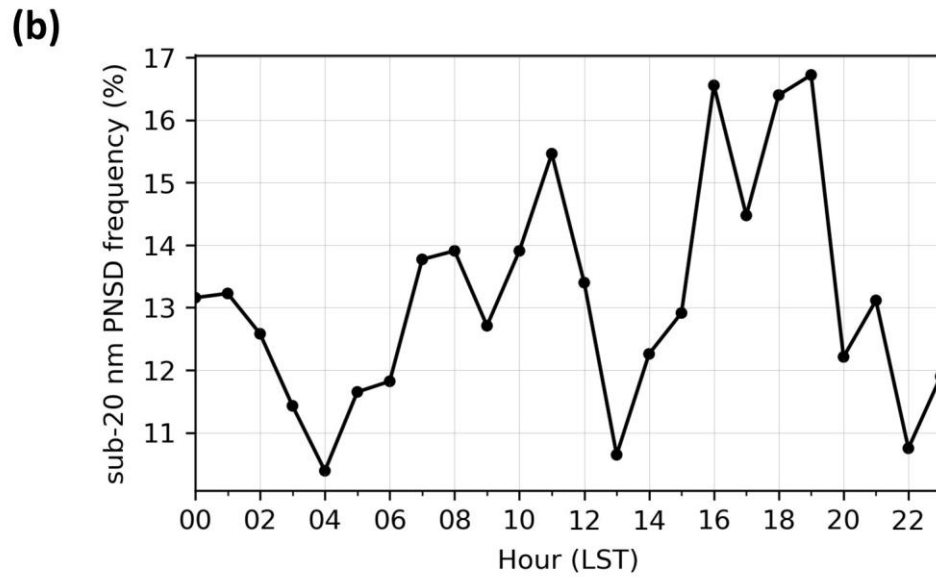

**Figure S3. Frequency of occurrence of the sub-20 nm PNSDs. (a) Monthly frequency and (b) Hourly frequency. The frequency was computed considering all PNSDs of one year of data.**
